# Supplementary material
Source: PubMed Central journal article supplement (PMC6232507)
Supplement: HESR-53-5035-s002.pdf [file HESR-53-5035-s002.pdf]

**Appendix Table 1.** Thirty-one comorbidities included as covariates in all regressions

- Severe infection
- Other infectious disease & pneumonias
- Metastatic cancer/acute leukemia
- Severe cancer
- Other cancers
- Diabetes mellitus
- Protein-calorie malnutrition
- End-stage liver disease
- Severe hematological disorders
- Alcohol abuse
- Psychiatric comorbidity
- Hemiplegia, paraplegia, paralysis
- Seizure disorders
- Congestive heart failure
- Coronary atherosclerosis or angina
- Specified arrhythmias
- Chronic obstructive pulmonary disease
- Other chronic lung disorders
- Dialysis
- Decubitus ulcer or chronic skin ulcer
- Septicemia/shock
- Disorders of fluid, electrolytes
- Iron deficiency or other anemias
- Cardiorespiratory failure or shock
- Acute renal failure
- Pancreatic disease
- Rheumatoid arthritis
- Respirator dependence/tracheostomy
- Transplants
- Coagulation /hematologic disorders
- Hip fracture/dislocation



Appendix to “Effect of hospital and post-acute care provider participation in accountable care organizations on patient outcomes and Medicare spending” by Agarwal and Werner 3

|                               |     |      |      |      |      |      |      |      |      |      |      |      |
|-------------------------------|-----|------|------|------|------|------|------|------|------|------|------|------|
| Total hip or knee replacement | 8.4 | 0.3  | 0.2  | 0.85 | 13.2 | 2.5  | 1.1  | 0.06 | 13.9 | -1.9 | -2.5 | 0.50 |
| Sepsis                        | 6.3 | 1.4  | 1.8  | 0.33 | 3.4  | 1.0  | 1.3  | 0.20 | 2.1  | 0.7  | 1.0  | 0.38 |
| Congestive heart failure      | 5.2 | 0.4  | 0.0  | 0.19 | 6.2  | -0.3 | 0.0  | 0.40 | 2.3  | 0.4  | 0.5  | 0.69 |
| Urinary tract infection       | 4.4 | -0.4 | -0.4 | 0.87 | 2.5  | 0.0  | -0.1 | 0.79 | 1.3  | 0.3  | 0.2  | 0.65 |
| Hip fracture                  | 5.6 | 0.0  | -0.1 | 0.85 | 0.9  | 0.0  | -0.1 | 0.77 | 9.8  | -0.4 | -1.3 | 0.22 |
| Pneumonia                     | 4.4 | 0.4  | 0.3  | 0.64 | 4.1  | 0.4  | 0.5  | 0.84 | 1.5  | -0.2 | 0.5  | 0.02 |

\* Change from 2010 to 2013 among patients admitted to a hospital and PAC provider that participated in an ACO during the study period

\*\* Change from 2010 to 2013 among patients admitted to a hospital and PAC provider that did not participate in an ACO during the study period

\*\*\* P-value for difference in change over time between hospitals and PACs that participated in ACOs versus those that did not participate

**Appendix Table 3.** Differences in trends in outcomes between hospitals that ever join an ACO and hospitals that never join an ACO in pre-ACO period (2010-2011).

|                              | <b>SNF cohort</b>   |         | <b>HH cohort</b>    |         | <b>IRF cohort</b>   |         |
|------------------------------|---------------------|---------|---------------------|---------|---------------------|---------|
|                              | Difference in trend | P-value | Difference in trend | P-value | Difference in trend | P-value |
| 30-day readmission or death  | -0.0005             | 0.61    | -0.0003             | 0.76    | -0.003              | 0.29    |
| Medicare spending on episode | -58.1               | 0.12    | 18.1                | 0.56    | 118.7               | 0.22    |
| Length of stay of episode    | -0.08               | 0.06    | -0.11               | 0.07    | 0.07                | 0.17    |

Differences in trends in outcomes between hospitals that ever join an ACO with each PAC provider and hospitals that never join an ACO with each PAC provider in pre-ACO period (2010-2011).

|                              | <b>SNF cohort</b>   |         | <b>HH cohort</b>    |         | <b>IRF cohort</b>   |         |
|------------------------------|---------------------|---------|---------------------|---------|---------------------|---------|
|                              | Difference in trend | P-value | Difference in trend | P-value | Difference in trend | P-value |
| 30-day readmission or death  | -0.005              | 0.39    | -0.003              | 0.09    | 0.000               | 0.99    |
| Medicare spending on episode | 124.2               | 0.86    | 12.5                | 0.88    | 123.3               | 0.36    |
| Length of stay of episode    | -0.08               | 0.27    | -0.16               | 0.11    | 0.05                | 0.48    |

**Appendix Table 4.** Adjusted change in outcomes after a hospital or post-acute care provider joined an ACO, adjusting for PAC provider characteristics.\*

|                                                  | <b>Skilled nursing facility cohort</b> |             |                                                     |             |
|--------------------------------------------------|----------------------------------------|-------------|-----------------------------------------------------|-------------|
|                                                  | (n=3,503,296)                          |             |                                                     |             |
|                                                  | <b>Hospital in ACO</b>                 |             | <b>Hospital and skilled nursing facility in ACO</b> |             |
|                                                  | Absolute change<br>[95% CI]            | P-<br>value | Absolute change<br>[95% CI]                         | P-<br>value |
| <b>30-day readmission or mortality (%)</b>       | -0.5<br>[-0.9 to -0.1]                 | 0.01        | -0.8<br>[-2.2 to 0.7]                               | 0.30        |
| <b>30-day mortality (%)</b>                      | -0.1<br>[-0.4 to 0.2]                  | 0.61        | -0.2<br>[-1.4 to 1.0]                               | 0.73        |
| <b>Medicare spending on total episode (\$)</b>   | -145<br>[-279 to -11]                  | 0.03        | -903<br>[-1499 to -308]                             | 0.003       |
| <b>Medicare spending on hospitalization (\$)</b> | -60<br>[-141 to 22]                    | 0.15        | -136<br>[-334 to 62]                                | 0.18        |
| <b>Medicare spending on PAC (\$)</b>             | 49<br>[-29 to 128]                     | 0.22        | -482<br>[-885 to -79]                               | 0.02        |
| <b>Length of stay in total episode (days)</b>    | 0.0<br>[-0.1 to 0.3]                   | 0.38        | -1.8<br>[-2.6 to -0.9]                              | <.001       |
| <b>Length of stay in hospital (days)</b>         | 0.0<br>[-0.0 to 0.1]                   | 0.70        | 0.2<br>[-0.1 to 0.4]                                | 0.19        |
| <b>Length of stay in PAC (days)</b>              | 0.2<br>[-0.0 to 0.3]                   | 0.07        | -1.7<br>[-2.6 to -0.8]                              | <.001       |

|                                            | <b>Home health cohort</b>   |             |                                               |             |
|--------------------------------------------|-----------------------------|-------------|-----------------------------------------------|-------------|
|                                            | (n=1,597,751)               |             |                                               |             |
|                                            | <b>Hospital in ACO</b>      |             | <b>Hospital and home health agency in ACO</b> |             |
|                                            | Absolute change<br>[95% CI] | P-<br>value | Absolute change<br>[95% CI]                   | P-<br>value |
| <b>30-day readmission or mortality (%)</b> | -0.4                        | 0.03        | -0.4                                          | 0.26        |

|                                                  |                |       |                |      |
|--------------------------------------------------|----------------|-------|----------------|------|
|                                                  | [-0.8 to -0.0] |       | [-1.1 to 0.3]  |      |
| <b>30-day mortality (%)</b>                      | -0.1           | 0.27  | -0.1           | 0.62 |
|                                                  | [-0.3 to 0.0]  |       | [-0.5 to 0.3]  |      |
| <b>Medicare spending on total episode (\$)</b>   | -60            | 0.33  | -137           | 0.24 |
|                                                  | [-183 to 61]   |       | [-366 to 93]   |      |
| <b>Medicare spending on hospitalization (\$)</b> | -44            | 0.38  | -86            | 0.41 |
|                                                  | [-142 to 55]   |       | [-291 to 119]  |      |
| <b>Medicare spending on PAC (\$)</b>             | 41             | 0.004 | -30            | 0.08 |
|                                                  | [13 to 68]     |       | [-4 to 63]     |      |
| <b>Length of stay for total episode (days)</b>   | -0.2           | 0.34  | -0.6           | 0.14 |
|                                                  | [-0.5 to 0.2]  |       | [-1.4 to 0.2]  |      |
| <b>Length of stay in hospital (days)</b>         | 0.0            | 0.34  | 0.0            | 0.82 |
|                                                  | [-0.1 to 0.0]  |       | [-0.1 to 0.1]  |      |
| <b>Length of stay in PAC (days)</b>              | -0.1           | 0.40  | -0.7           | 0.04 |
|                                                  | [-0.4 to 0.2]  |       | [-1.3 to -0.0] |      |

**Inpatient rehabilitation cohort**

(n=445,264)

|                                                  | <b>Hospital in ACO</b>      |         | <b>Hospital and inpatient rehabilitation facility in ACO</b> |         |
|--------------------------------------------------|-----------------------------|---------|--------------------------------------------------------------|---------|
|                                                  | Absolute change<br>[95% CI] | P-value | Absolute change<br>[95% CI]                                  | P-value |
| <b>30-day readmission or mortality (%)</b>       | -0.5<br>[-1.4 to 0.4]       | 0.29    | 0.4<br>[-0.9 to 1.7]                                         | 0.55    |
| <b>30-day mortality (%)</b>                      | -0.5<br>[-1.0 to -0.0]      | 0.04    | 0.1<br>[-0.6 to 0.8]                                         | 0.79    |
| <b>Medicare spending on total episode (\$)</b>   | 227<br>[-178 to 631]        | 0.27    | -10<br>[-555 to 535]                                         | 0.97    |
| <b>Medicare spending on hospitalization (\$)</b> | 60<br>[-191 to 311]         | 0.64    | -140<br>[-371 to 91]                                         | 0.24    |
| <b>Medicare spending on PAC (\$)</b>             | 43<br>[-186 to 271]         | 0.71    | 4<br>[-372 to 380]                                           | 0.98    |
| <b>Length of stay in total episode (days)</b>    | 0.3<br>[-0.1 to 0.7]        | 0.15    | 0.3<br>[-0.3 to 1.0]                                         | 0.28    |
| <b>Length of stay in hospital (days)</b>         | -0.1                        | 0.13    | -0.1                                                         | 0.12    |

|                                     |               |      |               |      |
|-------------------------------------|---------------|------|---------------|------|
|                                     | [-0.2 to 0.0] |      | [-0.3 to 0.0] |      |
| <b>Length of stay in PAC (days)</b> | 0.1           | 0.24 | 0.2           | 0.28 |
|                                     | [-0.1 to 0.3] |      | [-0.1 to 0.4] |      |

---

\*SNF covariates include number of beds, hospital owned, profit status, and overall star rating; HH covariates include number of full-time equivalent staff, hospital owned, and profit status; IRF covariates include number of beds, hospital owned, and profit status.

**Appendix Table 5.** Characteristics of hospitals participating in ACOs and not in ACOs among a propensity-score matched cohort of hospitals, using 1:5 matching without replacement

|                            | <b>Hospitals<br/>participating in ACO<br/>with or without PAC</b> | <b>Hospitals not<br/>participating in an<br/>ACO</b> |
|----------------------------|-------------------------------------------------------------------|------------------------------------------------------|
| Number of hospitals, n (%) | 293 (16.7%)                                                       | 1,465 (83.3%)                                        |
| Number of beds, n (%)      |                                                                   |                                                      |
| <100                       | 52 (17.8%)                                                        | 260 (17.8%)                                          |
| 100-250                    | 99 (33.9%)                                                        | 496 (33.9%)                                          |
| 250+                       | 142 (48.4%)                                                       | 709 (48.4%)                                          |
| Profit status, n (%)       |                                                                   |                                                      |
| For profit                 | 23 (7.9%)                                                         | 115 (7.9%)                                           |
| Not for profit             | 240 (81.9%)                                                       | 1200 (81.9%)                                         |
| Public                     | 30 (10.2%)                                                        | 150 (10.2%)                                          |
| Rural, n (%)               | 41 (14.0%)                                                        | 204 (13.9%)                                          |
| Teaching status, n (%)     |                                                                   |                                                      |
| Non-teaching               | 169 (57.7%)                                                       | 847 (57.8%)                                          |
| Minor teaching             | 69 (23.6%)                                                        | 344 (23.5%)                                          |
| Major teaching             | 55 (18.8%)                                                        | 274 (18.7%)                                          |



**Appendix Table 6.** Adjusted change in outcomes after a hospital or post-acute care provider joined an ACO in cohort of propensity-score matched hospitals

|                                                  | <b>Skilled nursing facility cohort</b> |             |                                                     |             |
|--------------------------------------------------|----------------------------------------|-------------|-----------------------------------------------------|-------------|
|                                                  | <b>(n=2,327,605)</b>                   |             |                                                     |             |
|                                                  | <b>Hospital in ACO</b>                 |             | <b>Hospital and skilled nursing facility in ACO</b> |             |
|                                                  | Absolute change<br>[95% CI]            | P-<br>value | Absolute change<br>[95% CI]                         | P-<br>value |
| <b>30-day readmission or mortality (%)</b>       | -0.5<br>[-.86 to -.05]                 | 0.03        | -1.5<br>[-3.0 to -.06]                              | 0.04        |
| <b>30-day mortality (%)</b>                      | -0.1<br>[-.39 to .22]                  | 0.60        | -0.61<br>[-1.87 to .66]                             | 0.35        |
| <b>Medicare spending on total episode (\$)</b>   | -224<br>[-362 to -85]                  | 0.002       | -1624<br>[-2379 to -869]                            | <.001       |
| <b>Medicare spending on hospitalization (\$)</b> | -82<br>[-166 to 2]                     | 0.06        | -174<br>[-371 to 24]                                | 0.09        |
| <b>Medicare spending on PAC (\$)</b>             | -10<br>[-91 to 72]                     | 0.82        | 919<br>[-1486 to -351]                              | 0.002       |
| <b>Length of stay in total episode (days)</b>    | 0.0<br>[-0.2 to 0.1]                   | 0.62        | -3.2<br>[-4.4 to -2.1]                              | <.001       |
| <b>Length of stay in hospital (days)</b>         | 0.0<br>[-0.1 to 0.1]                   | 0.72        | 0.1<br>[-0.1 to 0.4]                                | 0.29        |
| <b>Length of stay in PAC (days)</b>              | 0.0<br>[-0.2 to 0.2]                   | 0.87        | -3.0<br>[-4.2 to -1.8]                              | <.001       |

|                                            | <b>Home health cohort</b>   |             |                                               |             |
|--------------------------------------------|-----------------------------|-------------|-----------------------------------------------|-------------|
|                                            | <b>(n=1,068,940)</b>        |             |                                               |             |
|                                            | <b>Hospital in ACO</b>      |             | <b>Hospital and home health agency in ACO</b> |             |
|                                            | Absolute change<br>[95% CI] | P-<br>value | Absolute change<br>[95% CI]                   | P-<br>value |
| <b>30-day readmission or mortality (%)</b> | -0.4                        | 0.04        | -0.4                                          | 0.24        |

|                                                  |                  |      |                |       |
|--------------------------------------------------|------------------|------|----------------|-------|
|                                                  | [-0.85 to -0.02] |      | [-1.11 to 0.3] |       |
| <b>30-day mortality (%)</b>                      | -0.1             | 0.22 | -0.1           | 0.65  |
|                                                  | [-.35 to .07]    |      | [-.54 to .34]  |       |
| <b>Medicare spending on total episode (\$)</b>   | -83              | 0.20 | -231           | 0.04  |
|                                                  | [-210 to 43]     |      | [-454 to -7]   |       |
| <b>Medicare spending on hospitalization (\$)</b> | -50              | 0.33 | -91            | 0.38  |
|                                                  | [-152 to 52]     |      | [-298 to 114]  |       |
| <b>Medicare spending on PAC (\$)</b>             | 35               | 0.02 | -49            | 0.01  |
|                                                  | [7 to 63]        |      | [-87 to -11]   |       |
| <b>Length of stay for total episode (days)</b>   | -0.2             | 0.25 | -1.7           | <.001 |
|                                                  | [-0.5 to 0.1]    |      | [-2.3 to -1.0] |       |
| <b>Length of stay in hospital (days)</b>         | 0.0              | 0.34 | 0.0            | 0.87  |
|                                                  | [-0.1 to 0.0]    |      | [-0.1 to 0.1]  |       |
| <b>Length of stay in PAC (days)</b>              | -0.1             | 0.37 | -1.7           | <.001 |
|                                                  | [-0.5 to 0.2]    |      | [-2.2 to -1.2] |       |

**Inpatient rehabilitation cohort**

(n=445,264)

**Hospital and inpatient  
rehabilitation facility in  
ACO**

**Hospital in ACO**

|                                                  | Absolute change<br>[95% CI] | P-<br>value | Absolute change<br>[95% CI] | P-<br>value |
|--------------------------------------------------|-----------------------------|-------------|-----------------------------|-------------|
| <b>30-day readmission or mortality (%)</b>       | -0.4<br>[-1.2 to 0.6]       | 0.45        | 0.5<br>[-0.8 to 1.9]        | 0.45        |
| <b>30-day mortality (%)</b>                      | -0.4<br>[-.91 to .01]       | 0.10        | 0.2<br>[-.47 to .88]        | 0.55        |
| <b>Medicare spending on total episode (\$)</b>   | 207<br>[-204 to 617]        | 0.32        | -63<br>[-613 to 487]        | 0.82        |
| <b>Medicare spending on hospitalization (\$)</b> | 24<br>[-227 to 276]         | 0.85        | -164<br>[-402 to 73]        | 0.18        |
| <b>Medicare spending on PAC (\$)</b>             | 77<br>[-157 to 310]         | 0.52        | -47<br>[-436 to 342]        | 0.81        |
| <b>Length of stay in total episode (days)</b>    | 0.3<br>[-0.2 to 0.7]        | 0.30        | 0.6<br>[-0.0 to 1.3]        | 0.07        |
| <b>Length of stay in hospital (days)</b>         | -0.1<br>[-0.2 to 0.0]       | 0.11        | -0.1<br>[-0.3 to 0.0]       | 0.17        |

|                                     |               |      |               |      |
|-------------------------------------|---------------|------|---------------|------|
| <b>Length of stay in PAC (days)</b> | 0.1           | 0.28 | 0.1           | 0.39 |
|                                     | [-0.1 to 0.3] |      | [-0.2 to 0.4] |      |

---
